# Supplementary material for: Realist evaluation of Autism ServiCe Delivery (RE-ASCeD): which diagnostic pathways work best, for whom and in what context? Findings from a rapid realist review
Source: PubMed Central journal article supplement — BMJ Open. 2021 Dec 14;11(12):e051241. doi: 10.1136/bmjopen-2021-051241 (PMC8672008; doi:10.1136/bmjopen-2021-051241), 2021-12-14
Supplement: bmjopen-2021-051241supp001.pdf [file bmjopen-2021-051241supp001.pdf]

**Supplementary Document 1. Database Search Strategies****Number of databases searched: 7**

Medline (Ovid)  
 Embase (Ovid)  
 PsycINFO (Ovid)  
 Social Policy & Practice (Ovid)  
 CINAHL Plus (EBSCO)  
 Cochrane Library  
 Web of Science (Clarivate)

**Search limits:** 2011-current; English language; UK only

Note: We used 2020 date in the Medline search strategy because Medline includes a small number of in-process citations ahead of publication date (Medline in-Process & Other Non-indexed Citations).

Literature search strategy used for **Medline** (search run on 25.11.19) is attached below. Additional search strategies available from the authors.

|    |                                                                                                                   |         |
|----|-------------------------------------------------------------------------------------------------------------------|---------|
| 1  | exp Autism Spectrum Disorder/di, ep, th [Diagnosis, Epidemiology, Therapy]                                        | 10929   |
| 2  | (autism spectrum disorder* or ASD or autism).ti,kw.                                                               | 23890   |
| 3  | (asperger* syndrome or asperger*).ti,kw.                                                                          | 1150    |
| 4  | 1 or 2 or 3                                                                                                       | 27668   |
| 5  | adolescent/ or child/ or child, preschool/                                                                        | 2937612 |
| 6  | (child or children* or pre-school child* or adolescent*).kw.                                                      | 70707   |
| 7  | 5 or 6                                                                                                            | 2940479 |
| 8  | 4 and 7                                                                                                           | 19625   |
| 9  | Community Mental Health Services/                                                                                 | 18302   |
| 10 | ("child and adolescent mental health service*" or "child & adolescent mental health service*" or CAMHS).ti,ab,kw. | 491     |
| 11 | ("child and adolescent mental health team*" or child mental health service*).ti,ab.                               | 149     |
| 12 | child development clinic*.ti,ab.                                                                                  | 39      |
| 13 | 9 or 10 or 11 or 12                                                                                               | 18873   |
| 14 | 8 and 13                                                                                                          | 69      |
| 15 | Diagnostic Services/                                                                                              | 1916    |
| 16 | (diagnostic service model* or diagnostic assessment model* or diagnostic assessment or diagnostic process).ti,ab. | 6616    |
| 17 | (diagnostic pathway* or diagnostic evaluation or referral pathway*).ti,ab.                                        | 8902    |
| 18 | early diagnosis/ or early intervention/                                                                           | 28062   |
| 19 | "Referral and Consultation"/                                                                                      | 64435   |

|    |                                                                                                                                                                                               |            |
|----|-----------------------------------------------------------------------------------------------------------------------------------------------------------------------------------------------|------------|
| 20 | Critical Pathways/                                                                                                                                                                            | 6455       |
| 21 | ((multidisciplinary or multi-disciplinary or interprofessional or inter-professional or intraprofessional or intra-professional or interdisciplinary or inter-disciplinary) adj team*).ti,ab. | 18640      |
| 22 | "delivery of health care, integrated"/ or health services accessibility/ or patient care team/                                                                                                | 143724     |
| 23 | Professional-Family Relations/                                                                                                                                                                | 14480      |
| 24 | (service delivery or diagnostic experience*).ti,ab.                                                                                                                                           | 10451      |
| 25 | 15 or 16 or 17 or 18 or 19 or 20 or 21 or 22 or 23 or 24                                                                                                                                      | 283159     |
| 26 | 8 and 25                                                                                                                                                                                      | 1254       |
| 27 | (cost-effectiveness or evaluation).ti,ab.                                                                                                                                                     | 1027879    |
| 28 | Efficiency, Organizational/ or Efficiency/                                                                                                                                                    | 34521      |
| 29 | evaluation studies as topic/ or program evaluation/ or validation studies as topic/                                                                                                           | 183858     |
| 30 | "quality of health care"/ or "outcome and process assessment (health care)"/                                                                                                                  | 95758      |
| 31 | Waiting Lists/ or Time Factors/                                                                                                                                                               | 1175790    |
| 32 | (family experience or parent experience).ti,ab.                                                                                                                                               | 365        |
| 33 | 27 or 28 or 29 or 30 or 31 or 32                                                                                                                                                              | 2377747    |
| 34 | 14 or 26                                                                                                                                                                                      | 1295       |
| 35 | limit 34 to (english language and yr="2011 - 2020")                                                                                                                                           | 738        |
| 36 | 33 and 34                                                                                                                                                                                     | 256        |
| 37 | limit 36 to (english language and yr="2011 - 2020")                                                                                                                                           | 141        |
| 38 | remove duplicates from 35                                                                                                                                                                     | <b>736</b> |
